# Supplementary material for: Preparation and characterization of soybean insoluble dietary fiber and its prebiotic effect on dyslipidemia and hepatic steatosis in high fat-fed C57BL/6J mice
Source: Royal Society of Chemistry journal article supplement (doi:10.1039/d1fo01050f), 2021-01-01
Supplement: d1fo01050f1.pdf [file d1fo01050f1.pdf]

- 1 Supplementary tables
- 2 Table s1
- 3 Composition of experimental diet

| Ingredient              | ND <sup>α</sup> |       | HFD <sup>β</sup> |       |
|-------------------------|-----------------|-------|------------------|-------|
|                         | gm              | kcal  | gm               | kcal  |
| Casein, 80 Mesh         | 200             | 800   | 200              | 800   |
| L-cystine               | 3               | 12    | 3                | 12    |
| Corn starch             | 315             | 1260  | 72.8             | 291   |
| Maltodextrin 10         | 35              | 140   | 100              | 400   |
| Sucrose                 | 350             | 1400  | 172.8            | 691   |
| Cellulose, BW200        | 50              | 0     | 50               | 0     |
| Soybean oil             | 25              | 225   | 25               | 225   |
| Lard                    | 20              | 180   | 177.5            | 1598  |
| Mineral Mix S10026      | 10              | 0     | 10               | 0     |
| Dicalcium Phosphate     | 13              | 0     | 13               | 0     |
| Calcium Carbonate       | 5.5             | 0     | 5.5              | 0     |
| Potassium citrate,1 H2O | 16.5            | 0     | 16.5             | 0     |
| Vitamin Mix V10001      | 10              | 40    | 10               | 40    |
| Choline Bitartrate      | 2               | 0     | 2                | 0     |
| FD&C Red Dye #40        | 0.05            | 0     | 0.05             | 0     |
| Total                   | 1055.05         | 4057  | 858.15           | 4057  |
|                         | gm%             | kcal% | gm%              | kcal% |
| Protein                 | 19.2            | 20    | 24               | 20    |
| Carbohydrate            | 67.3            | 70    | 41               | 35    |
| Fat                     | 4.3             | 10    | 24               | 45    |
| Total                   |                 | 100   |                  | 100   |
| kcal/gm                 | 3.85            |       | 4.73             |       |

4 <sup>α</sup> ND, #D12450B normal diet with 4% fat (10% fat calories) content fed group;

5  $\beta$  HFD, #D12451 high fat diet with 24% fat (45% fat calories) content fed group; PC,  
6 high-fat diet plus orlistat capsule (60 mg/kg/bw) fed group; LIDF, high-fat diet plus  
7 IDF (250 mg/kg/bw) fed group; MIDF, high-fat diet plus IDF (500 mg/kg/bw) fed  
8 group; HIDF, high-fat diet plus IDF (1000 mg/kg/bw) fed group.

9

10 Table s2

11 Sequences of primers used in quantitative real-time reverse transcription polymerase  
12 chain reaction

| Genes          | Forward primer (5'-3')   | Reverse primer (5'-3')   |
|----------------|--------------------------|--------------------------|
| $\beta$ -actin | GGCTGTATTCCCCTCCATCG     | CCAGTTGGTAACAATGCCATGT   |
| SREBP-1c       | GCTACCGGTCTTCTATCAATGA   | CGCAAGACAGCAGATTTATTCA   |
| SCD1           | AACATTCAATCCCGGGAGAATA   | GAAACTTTCTTCCGGTCGTAAG   |
| PPAR $\alpha$  | CCAGATGTGCCTGCTGCTTCC    | TGGTCGGTCTACAGAGTGAGTTCC |
| CYP4a10        | GACCCTAGACACTGTCATGAAA   | AAAGATATTCCTCACACGGGAG   |
| CPT1a          | AGGAGGAGGATGGCAGAAGTTGAG | AAGCAGAGTCGCAGCATGAATGG  |

13

14

15

16

17

18

19

20

21

22 Supplementary figure

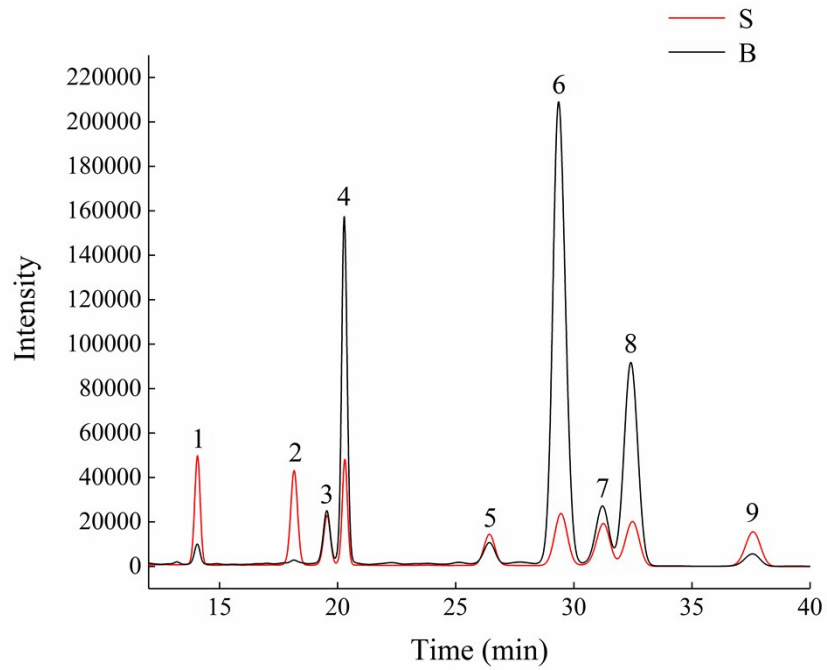

23

24 Fig.s1. Analysis of monosaccharide composition of IDF by HPLC. S, standard; B,  
25 soybean insoluble dietary fiber; Numbers 1 to 9 represent the standards of mannose,  
26 glucuronic acid, rhamnose, galacturonic acid, glucose, galactose, xylose, arabinose  
27 and fucose respectively.
